# Supplementary material for: Measurement Report: Investigation on the sources and formation processes of dicarboxylic acids and related species in urban aerosols before and during the COVID-19 lockdown in Jinan, East China
Source: Copernicus journal article supplement (doi:10.5194/acp-23-14481-2023), 2023-11-24
Supplement: Supplementary file 1 [file acp-23-14481-2023-supplement.pdf]

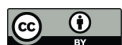

*Supplement of*

**Measurement Report: Investigation on the sources and formation processes of dicarboxylic acids and related species in urban aerosols before and during the COVID-19 lockdown in Jinan, East China**

**Jingjing Meng et al.**

*Correspondence to:* Pingqing Fu ([fupingqing@tju.edu.cn](mailto:fupingqing@tju.edu.cn))

The copyright of individual parts of the supplement might differ from the article licence.

# Supporting Information

## Text S1. Stable carbon isotopic composition of diacids and related compounds

The isotopic analytical precision was  $\leq 0.5\text{‰}$  for a peak height ( $m/z$  44) of 0.2 – 8 V. The isotopic composition of diacids and their derivatives is reported in the  $\delta$  notation relative to the Pee Dee Belemnite (PDB) standard as follows:

$$\delta^{13}\text{C} (\text{‰}) = \left[ \left( \frac{^{13}\text{C}/^{12}\text{C}}{^{13}\text{C}/^{12}\text{C}} \right)_{\text{sample}} / \left( \frac{^{13}\text{C}/^{12}\text{C}}{^{13}\text{C}/^{12}\text{C}} \right)_{\text{PDB}} - 1 \right] \times 10^3$$

After the measurement of isotopic compositions of butyl esters,  $\delta^{13}\text{C}$  of individual diacids is calculated by the following mass balance equation:

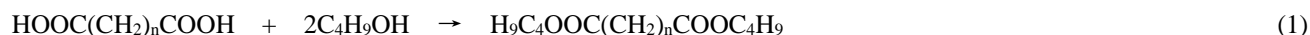

(unknown  $\delta^{13}\text{C}_{\text{Diacid}}$ ) (known  $\delta^{13}\text{C}_{\text{BuOH}}$ ) (measured  $\delta^{13}\text{C}_{\text{DIBE}}$ )

$$\delta^{13}\text{C}_{\text{DIBE}} = f_{\text{Diacid}}\delta^{13}\text{C}_{\text{Diacid}} + f_{\text{BuOH}}\delta^{13}\text{C}_{\text{BuOH}} \quad (2)$$

where  $\delta^{13}\text{C}_{\text{Diacid}}$ ,  $\delta^{13}\text{C}_{\text{BuOH}}$ , and  $\delta^{13}\text{C}_{\text{DIBE}}$  represent the carbon isotopic composition of diacid, 1-butanol, and diacid dibutyl ester, respectively;  $f_{\text{Diacid}}$  and  $f_{\text{BuOH}}$  are fractions of carbon in the ester derived from diacid and butanol, respectively.  $f_{\text{Diacid}}$  and  $f_{\text{BuOH}}$  of  $\text{C}_2$  are 0.2 and 0.8, respectively. The  $f_{\text{Diacid}}$  and  $f_{\text{BuOH}}$  values of other organic acids have been described in Kawamura and Watanabe (2004). Before actual sample analysis, we confirmed that  $\delta^{13}\text{C}$  values of the working standards (a mixture of normal  $\text{C}_{16}$ – $\text{C}_{30}$  alkanes with  $0.55$ – $2.83$   $\text{ng } \mu\text{L}^{-1}$ ) were equivalent to the theoretical values within an analytical error of  $<0.2\text{‰}$ .

In addition,  $2 \mu\text{L}$  internal standard ( $n\text{-C}_{13}$  alkane,  $-27.24 \text{‰}$ ) was spiked to the ester fraction, the esters were injected to a gas chromatograph interfaced to isotope ratio mass spectrometer to determine their stable carbon isotopic composition. GC was installed with a HP manual on-column injector and a capillary column (CIP-Sil 8CB,  $60 \text{ m} \times 0.32 \text{ mm} \times 0.25 \mu\text{m}$ ) was used with a column oven temperature programmed from  $50$  to  $120^\circ\text{C}$  at a rate of  $30^\circ\text{C min}^{-1}$  and then to  $300^\circ\text{C}$  at a rate of  $6^\circ\text{C min}^{-1}$ . Flow rate of carrier gas (He) was maintained at  $1.7 \text{ mL min}^{-1}$ .

In our manuscript, we stated that the recoveries of the target compounds were from 80% to 85%, which was not for yield during the derivatization reaction. The yield of derivatization reaction with 14%  $\text{BF}_3/n\text{-butanol}$  was 100%, during which the carboxyl functional group was fully derivatized to butyl ester, and the aldehyde and keto groups were fully derivatized to dibutoxy acetal. The  $\delta^{13}\text{C}$  values for diacids and related compounds could not be directly determined, so these organic species are derivatized with  $\text{BF}_3/n\text{-butanol}$  to dibutyl esters which are analyzed for the stable carbon isotopic composition using a GC-IR-MS. The  $\delta^{13}\text{C}$  values for individual diacids are then calculated from  $\delta^{13}\text{C}$  of 1-butanol and butyl ester derivative using a mass balance equation. The accuracy of the  $\delta^{13}\text{C}$  measurement for these target compounds is within  $0.8\text{‰}$ . The method developed for the determination of stable carbon isotopic composition of diacids and related compounds isolated from aerosols is reliable and scientific, and has been used widely in many studies (Aggarwal and Kawamura, 2008; Meng et al., 2020; Mkombe et al., 2014; Pavuluri et al., 2011; Qi et al., 2022; Shen et al., 2022; Shen et al., 2023; Wang et al., 2012; Wang and Kawamura, 2006; Xu et al., 2022a; Xu et al., 2022b; Zhang et al., 2016; Zhao et al., 2018).

### **Text S2. Potential source contribution function**

35 To analyze air masses from different origins reaching the sampling site, 48 h backward trajectory was performed using a Hybrid Single Particle Lagrangian Integrated Trajectory (HYSPLIT4) model. To determine the potential source regions of total diacids and related compounds, the potential source contribution function (PSCF) was used and detailed information was described in our previous study (Li et al., 2021).

### Text S3. Positive Matrix Factorization (PMF) model

In this study, the Environmental Protection Agency (EPA) PMF version 5.0 was used to perform the analysis (Norris et al., 2014). The PMF model has been widely applied to obtain source apportionment of organic aerosols in PM<sub>2.5</sub>. It decomposes the sample data matrix into factor contribution matrix and factor outline matrix, and then the source types and their contribution are calculated based on the input data. The PMF model is described as follows:

$$X_{ij} = \sum_{k=1}^P g_{ik} f_{ki} + e_{ij} \quad (3)$$

where  $X_{ij}$  represents the concentration of the species  $j$  detected in the sample  $i$ ,  $p$  represents the number of contribution factors of the samples,  $g_{ik}$  represents the relative contribution of factor  $k$  to the sample  $i$ ,  $f_{kj}$  represents the mass contribution of the species  $j$  in the factor  $k$ ,  $e_{ij}$  represents the error of the species  $j$  measured in the sample  $i$ . The matrix  $x$  is continuously decomposed to get minimum values of  $Q$  in order to obtain the optimal matrices  $g$  and  $f$ . The  $Q$  is defined as follows:

$$Q = \sum_{i=1}^n \sum_{j=1}^m \left( \frac{x_{ij} - \sum_{k=1}^P g_{ik} f_{ki}}{u_{ij}} \right)^2 = \sum_{i=1}^n \sum_{j=1}^m \left( \frac{e_{ij}}{u_{ij}} \right)^2 \quad (4)$$

where  $u_{ij}$  is the uncertainty of the concentration of the species  $j$  in the sample  $i$ . If the measured species concentration is below the method detection limit (MDL), it is replaced by 1/2 MDL, and the corresponding uncertainty is 5/6 MDL. When the concentration is higher than the MDL, the uncertainty is calculated as follows:

$$\text{Uncertainty} = \sqrt{(\text{error fraction} * \text{concentration})^2 + (0.5 * \text{MDL})^2} \quad (5)$$

where the error fraction is the estimation of the analytical uncertainty of the measured concentration or flux (Hovorka et al., 2015; Shrivastava et al., 2007; Wu et al., 2020).

Based on Norris et al. (2004) and Nayebar et al. (2018), the comparatively high signal-to-noise (S/N) ratios > 5 could be labeled as “strong” to enhance their effect on the model results for all species. The S/N ratios of species used in PMF model were higher than 8, thus these species were labeled as “strong”.

The concentrations of selected major diacids (including C<sub>2</sub>, C<sub>3</sub>, C<sub>4</sub>, C<sub>9</sub>, and Ph), oxoacids (including Pyr and ωC<sub>2</sub>), and α-dicarbonyls used in the PMF model accounted for 76.1 ± 6.0% and 82.8 ± 6.6% of total concentration of detected organic components (TDOCs) before and during the LCD, respectively. The other organic compounds (including C<sub>5</sub>-C<sub>8</sub>, C<sub>10</sub>, C<sub>11</sub>, iC<sub>4</sub>-iC<sub>6</sub>, M, F, mM, iPh, tPh, kC<sub>3</sub>, kC<sub>7</sub>, ωC<sub>3</sub>, ωC<sub>4</sub> and ωC<sub>7</sub>-ωC<sub>9</sub>) presented relatively low concentrations and occasionally were below the detection limit, which could enhance the uncertainties. Moreover, these unconsidered organic compounds were less indicative for identified sources than the selected major acids. Thus, we kept those organic compounds with low concentrations out of the model.

As discussed in Section 3.3, SO<sub>4</sub><sup>2-</sup> and LWC could be considered as significant influencing factors during the aqueous formation of C<sub>2</sub> before the LCD, and O<sub>3</sub> was a key influencing factor during the photochemical formation of C<sub>2</sub> during the

LCD. Therefore, those species have been put in the PMF model to distinguish the aqueous pathway from the gaseous photochemical pathway of the diacids formation.

70 The PMF model provides three uncertainty estimation methods to examine the robustness of the solution, namely, bootstrap (BS), displacement (DISP), and bootstrap combined displacement (BS-DISP), which can also provide a distribution range of the factor profiles through resampling for multi times and displacing with the Q value change within the preset value. Further details related to the error estimation methods can refer to Brown et al. (2015), Vossler et al. (2016), and Wang et al. (2018). In this study, PMF solutions of 4-6 factors were analyzed and showed the convergence result. The relevant Q values and  $Q_{\text{true}}/Q_{\text{robust}}$  for these solutions were shown in Table S5. Finally, the five-factor solution was selected as the best solution with physical means before ( $Q_{\text{true}}/Q_{\text{robust}}=1.05$ ,  $Q_{\text{true}}/Q_{\text{expected}}=1.27$ ) and during the LCD ( $Q_{\text{true}}/Q_{\text{robust}}=1.05$ ,  $Q_{\text{true}}/Q_{\text{expected}}=1.36$ ),  
75 respectively. The error code of DISP before or during the LCD was 0 (Table S6), indicating no error. The values in the first row of  $dQ^{\text{max}} = 4$  were zero before and during the LCD (Table S6), indicating that there was no significant rotational ambiguity and that the solution was sufficiently robust to be used. Mapping over 82% of the factors before or during the LCD indicated that the BS uncertainties could be interpreted and the number of factors may be appropriate. The Largest decrease in Q before  
80 and during the LCD was -0.048% and -0.061%, respectively (Table S6), suggesting the five-factor solution was more reliably attributed to sources than the four-factor solution and six-factor solution.

**Text S4. Quality assurance/quality control (QA/QC) of online air quality data**

85 Those measured parameters were obtained from one of the State Controlling Air Sampling Sites in Jinan (<https://www.aqistudy.cn/>). The QA/QC was operated strictly by professionals followed by “Technical Specification for Automatic Monitoring of Ambient Air Quality”, “Technical Standard for Ambient Air Quality Monitoring”, and “Technical Instruction” formulated by the Ministry of Ecology and Environment of the People's Republic of China.

### **Text S5. Aqueous phase formation of $\text{SO}_4^{2-}$ before the LCD**

90 The aqueous phase conversion of dissolved  $\text{SO}_2$  to  $\text{SO}_4^{2-}$  is probably the most important chemical formation pathway in the North China Plain during the wintertime (Sun et al., 2013; Wang et al., 2014; Zhang et al., 2015). A few studies have demonstrated that LWC and RH are considered as key factors determining  $\text{SO}_4^{2-}$  formation via aqueous reactions (Bikkina et al., 2017; Cheng et al., 2016). We observed a robust relationship of  $\text{SO}_4^{2-}$  with RH ( $R^2 = 0.58$ ) and LWC ( $R^2 = 0.71$ ) before the LCD (Fig. S3), indicating that the aqueous oxidation determined by LWC and RH played a dominant role in the formation  
95 of  $\text{SO}_4^{2-}$  before the LCD.

**Table S1. Correlation coefficients ( $R^2$ ,  $P < 0.01$ ) of levoglucosan and  $K^+$  with EC, OC, WSOC,  $C_2$ ,  $C_9$ , diacids, and total detected organic components (TDOCs).**

|                       | EC   | OC   | WSOC | $K^+$ | $C_2$ | $C_9$ | Diacids | TDOCs |
|-----------------------|------|------|------|-------|-------|-------|---------|-------|
| <b>Before the LCD</b> |      |      |      |       |       |       |         |       |
| Levoglucosan          | 0.62 | 0.66 | 0.45 | 0.77  | 0.61  | 0.74  | 0.62    | 0.73  |
| $K^+$                 | 0.57 | 0.56 | 0.55 | 1.00  | 0.68  | 0.64  | 0.59    | 0.65  |
| <b>During the LCD</b> |      |      |      |       |       |       |         |       |
| Levoglucosan          | 0.15 | 0.09 | 0.05 | 0.86  | 0.02  | 0.06  | 0.02    | 0.03  |
| $K^+$                 | 0.10 | 0.08 | 0.02 | 1.00  | 0.03  | 0.02  | 0.11    | 0.13  |



**Table S2. Statistic test for the differences in concentrations and mass ratios of major species in PM<sub>2.5</sub> before and during the LCD in Jinan.**

| Species/ Ratios                                                                                                               | <i>p</i>                 |
|-------------------------------------------------------------------------------------------------------------------------------|--------------------------|
| PM <sub>2.5</sub>                                                                                                             | <b>0.000<sup>a</sup></b> |
| PM <sub>10</sub>                                                                                                              | <b>0.000<sup>a</sup></b> |
| CO                                                                                                                            | <b>0.000<sup>a</sup></b> |
| SO <sub>2</sub>                                                                                                               | <b>0.000<sup>a</sup></b> |
| NO <sub>x</sub>                                                                                                               | <b>0.000<sup>a</sup></b> |
| O <sub>3</sub>                                                                                                                | <b>0.000<sup>a</sup></b> |
| RH (Relative humidity)                                                                                                        | <b>0.000<sup>a</sup></b> |
| Wind speed                                                                                                                    | <b>0.000<sup>a</sup></b> |
| OC (Organic carbon)                                                                                                           | <b>0.000<sup>a</sup></b> |
| EC (Elemental carbon)                                                                                                         | <b>0.000<sup>a</sup></b> |
| WSOC (Water-soluble organic compounds)                                                                                        | 0.098 <sup>b</sup>       |
| SIA (Total concentration of SO <sub>4</sub> <sup>2-</sup> , NO <sub>3</sub> <sup>-</sup> , and NH <sub>4</sub> <sup>+</sup> ) | <b>0.001<sup>a</sup></b> |
| LWC (Liquid water content)                                                                                                    | <b>0.000<sup>a</sup></b> |
| pH <sub>is</sub> (Particle in-situ pH)                                                                                        | 0.256 <sup>b</sup>       |
| C <sub>2</sub> (Oxalic acid)                                                                                                  | <b>0.004<sup>b</sup></b> |
| C <sub>9</sub> (Azelaic acid)                                                                                                 | <b>0.000<sup>a</sup></b> |
| Ph (Phthalic acid)                                                                                                            | <b>0.026<sup>b</sup></b> |
| Diacids (Dicarboxylic acids)                                                                                                  | <b>0.018<sup>b</sup></b> |
| Oxoacids                                                                                                                      | <b>0.003<sup>a</sup></b> |
| α-Dicarbonyls                                                                                                                 | 0.881 <sup>b</sup>       |
| TDOCs (Total detected organic components)                                                                                     | <b>0.014<sup>a</sup></b> |
| Levoglucosan                                                                                                                  | <b>0.003<sup>a</sup></b> |
| C <sub>2</sub> /Diacids                                                                                                       | <b>0.000<sup>a</sup></b> |
| C <sub>2</sub> /TDOCs                                                                                                         | <b>0.005<sup>a</sup></b> |
| C <sub>2</sub> /C <sub>4</sub> (Succinic acid)                                                                                | <b>0.000<sup>a</sup></b> |
| C <sub>3</sub> (Malonic acid)/C <sub>4</sub>                                                                                  | <b>0.000<sup>a</sup></b> |
| C <sub>9</sub> (Azelaic acid)/Diacids                                                                                         | <b>0.000<sup>a</sup></b> |
| Ph/Diacids                                                                                                                    | <b>0.027<sup>a</sup></b> |

<sup>a</sup>When the variables follow a normal distribution, ANOVA was employed to analyze the statistically significant differences between these two datasets before and during the LCD. <sup>b</sup>Otherwise, the Kruskal-Wallis test was used. Bold font represented the species (or ratios) that were statistically significantly different ( $p < 0.05$ ).

**Table S3. Statistic test for the day-night differences in concentrations and mass ratios of major species in PM<sub>2.5</sub> before or during the LCD, respectively.**

| Species/ Ratios                | Before the LCD           | During the LCD           |
|--------------------------------|--------------------------|--------------------------|
|                                | <i>p</i>                 | <i>p</i>                 |
| C <sub>2</sub>                 | <b>0.011<sup>a</sup></b> | <b>0.042<sup>a</sup></b> |
| Diacids                        | <b>0.032<sup>a</sup></b> | <b>0.046<sup>b</sup></b> |
| C <sub>2</sub> /Diacids        | <b>0.018<sup>a</sup></b> | <b>0.041<sup>b</sup></b> |
| C <sub>2</sub> /TDOCs          | <b>0.017<sup>b</sup></b> | <b>0.029<sup>a</sup></b> |
| Na <sup>+</sup>                | 0.764 <sup>b</sup>       | 0.362 <sup>b</sup>       |
| Ca <sup>2+</sup>               | 0.443 <sup>b</sup>       | 0.637 <sup>b</sup>       |
| Mg <sup>2+</sup>               | 1.000 <sup>b</sup>       | 0.784 <sup>b</sup>       |
| C <sub>2</sub> /Levogluconan   | <b>0.037<sup>a</sup></b> | 0.074 <sup>b</sup>       |
| C <sub>2</sub> /K <sup>+</sup> | <b>0.000<sup>a</sup></b> | 0.081 <sup>b</sup>       |

<sup>a</sup>When the variables follow a normal distribution, ANOVA was employed to analyze the statistically significant differences during the daytime and nighttime. <sup>b</sup>Otherwise, the Kruskal-Wallis test was used. Bold font represented the species (or ratios) that were statistically significantly different ( $p < 0.05$ ).

110

**Table S4. Comparison of C<sub>2</sub>, diacids, and TDOCs concentrations (ng m<sup>-3</sup>), and C<sub>3</sub>/C<sub>4</sub> ratio in Jinan with those in other Asian megacities during the wintertime.**

| Location              | Period              | Size              | C <sub>2</sub> | Diacids   | TDOCs     | C <sub>2</sub> /C <sub>4</sub> | C <sub>3</sub> /C <sub>4</sub> | Data source                |
|-----------------------|---------------------|-------------------|----------------|-----------|-----------|--------------------------------|--------------------------------|----------------------------|
| 14 Chinese cities     | 13–14 Jan 2003      | PM <sub>2.5</sub> | 558±351        | 904±480   | 974±499   | 7.0                            | 0.5                            | (Ho et al., 2007)          |
| Beijing, China        | Dec 2013            | PM <sub>2.5</sub> | 149±123        | 366±261   | 450±368   | 4.7                            | 0.6±0.1                        | (Zhao et al., 2018)        |
| Chengdu, China        | 7–23 Jan 2013       | PM <sub>2.1</sub> | 1380           | 3390      | 4285      | 3.2                            | 0.5±0.1                        | (Li et al., 2015)          |
| Xi'an, China          | Jan–Feb 2009        | PM <sub>10</sub>  | 1162±570       | 1843±810  | 2207±1044 | 11.9                           | 1.0                            | (Cheng et al., 2013)       |
| Tianjin, China        | 23 Nov–11 Dec 2016  | PM <sub>2.1</sub> | 526±335        | 1223±623  | 1438±739  | 3.2                            | 0.3                            | (Devineni et al., 2023)    |
| Liaocheng, China      | 17 Jan–16 Feb 2016  | PM <sub>2.5</sub> | 817±544        | 1415±899  | 1677±1026 | 3.6±0.9                        | 0.4±0.2                        | (Meng et al., 2020)        |
| Guangzhou, China      | Dec 2006–Jan 2007   | PM <sub>2.5</sub> | 182±106        | 384±171   | 414±184   | 9.9                            | 0.7                            | (Ho et al., 2011)          |
| Tianjin, China        | 1–28 Feb 2019       | PM <sub>2.5</sub> | 668±470        | 1137±707  | 1561      | 7.6                            | 1.0                            | (Zhao et al., 2023)        |
| Padori, South Korea   | 1–28 Feb 2019       | PM <sub>2.5</sub> | 389±204        | 582±266   | 750       | 8.3                            | 0.7                            | (Zhao et al., 2023)        |
| Daejeon, South Korea  | 1–28 Feb 2019       | PM <sub>2.5</sub> | 516±327        | 784±446   | 1108      | 10.0                           | 0.7                            | (Zhao et al., 2023)        |
| Ulaanbaatar, Mongolia | Nov 2007–Jan 2008   | PM <sub>2.5</sub> | 107±28         | 536±156   | 697±207   | 1.8±0.8                        | 0.2±0.1                        | (Jung et al., 2010)        |
| Chennai, India        | 23–28 Jan 2007      | PM <sub>10</sub>  | 472±137        | 695 ± 176 | 765       | 11.8                           | 1.5                            | (Pavuluri et al., 2010)    |
| Chennai, India        | 29 Jan–6 Feb 2007   | PM <sub>10</sub>  | 380±89         | 641 ± 157 | 719       | 7.9                            | 1.2                            | (Pavuluri et al., 2010)    |
| Tokyo, Japan          | 20–21 November 1989 | TSP               | 186            | 438       | 595       | 3.9                            | 0.9                            | (Kawamura and Yasui, 2005) |
| Jinan, China          | 6–23 Jan 2020       | PM <sub>2.5</sub> | 181±48         | 351±92    | 437±117   | 3.9±1.5                        | 0.3±0.1                        | This study                 |
| Jinan, China          | 31 Jan–17 Feb 2020  | PM <sub>2.5</sub> | 239±108        | 386±127   | 486±144   | 8.4±3.4                        | 1.6±0.4                        | This study                 |

115

**Table S5. Q values for PMF Analysis with different number of factors.**

| Number of factors         | *R <sup>2</sup> for all input species | Q <sub>true</sub> | Q <sub>robust</sub> | Q <sub>true</sub> /Q <sub>expected</sub> | Q <sub>true</sub> /Q <sub>robust</sub> |
|---------------------------|---------------------------------------|-------------------|---------------------|------------------------------------------|----------------------------------------|
| <b>(a) Before the LCD</b> |                                       |                   |                     |                                          |                                        |
| 4                         | 0.63-0.98                             | 1556.1            | 1480.2              | 2.241                                    | 1.051                                  |
| 5                         | 0.68-0.99                             | 1176.9            | 1123.5              | 1.273                                    | 1.047                                  |
| 6                         | 0.60-0.98                             | 905.2             | 851.6               | 2.454                                    | 1.062                                  |
| <b>(a) During the LCD</b> |                                       |                   |                     |                                          |                                        |
| 4                         | 0.32-0.96                             | 2722.0            | 2396.5              | 2.624                                    | 1.136                                  |
| 5                         | 0.52-0.99                             | 1859.3            | 1768.2              | 1.360                                    | 1.052                                  |
| 6                         | 0.37-0.84                             | 1334.1            | 1294.6              | 2.912                                    | 1.071                                  |

\*R<sup>2</sup> between the measured and predicted species

**Table S6. Summary of error estimation diagnostics from BS and DISP for PMF (a) Before the LCD and (b) During the LCD.**

| <b>(a) Before the LCD</b> |                |               |   |                              |    |    |
|---------------------------|----------------|---------------|---|------------------------------|----|----|
| DISP Diagnostics          |                | Error code: 0 |   | Largest decrease in Q:-0.048 |    |    |
| Factor                    | $dQ^{\max}=4$  | 0             | 0 | 0                            | 0  | 0  |
|                           | $dQ^{\max}=8$  | 0             | 0 | 0                            | 1  | 1  |
| Swaps                     | $dQ^{\max}=15$ | 0             | 1 | 3                            | 6  | 0  |
|                           | $dQ^{\max}=25$ | 0             | 1 | 5                            | 8  | 10 |
| <b>(b) During the LCD</b> |                |               |   |                              |    |    |
| DISP Diagnostics          |                | Error code: 0 |   | Largest decrease in Q:-0.061 |    |    |
| Factor                    | $dQ^{\max}=4$  | 0             | 0 | 0                            | 0  | 0  |
|                           | $dQ^{\max}=8$  | 0             | 0 | 0                            | 0  | 0  |
| Swaps                     | $dQ^{\max}=15$ | 0             | 0 | 1                            | 1  | 0  |
|                           | $dQ^{\max}=25$ | 0             | 1 | 8                            | 10 | 6  |

## Before the LCD

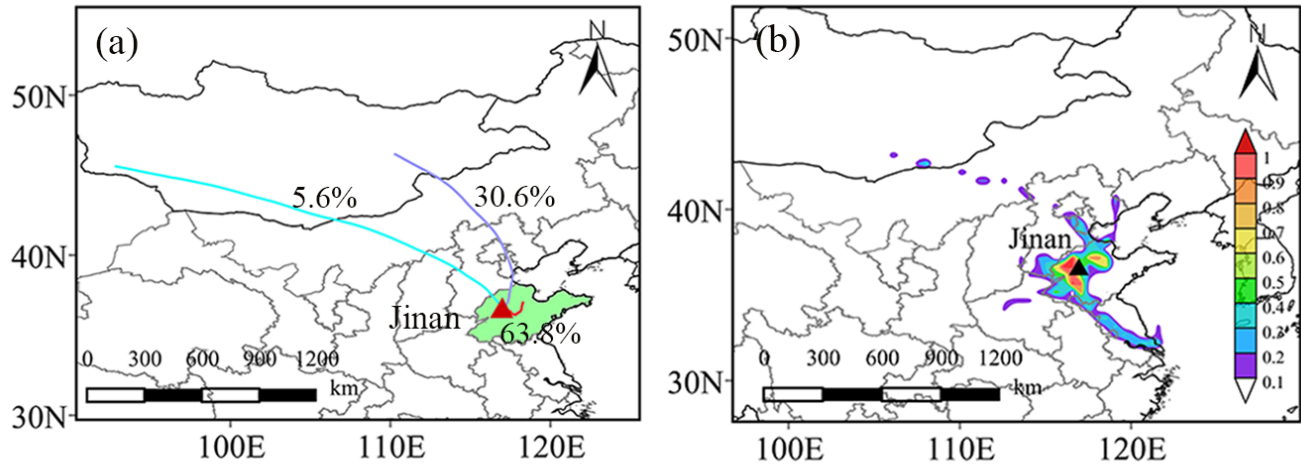

## During the LCD

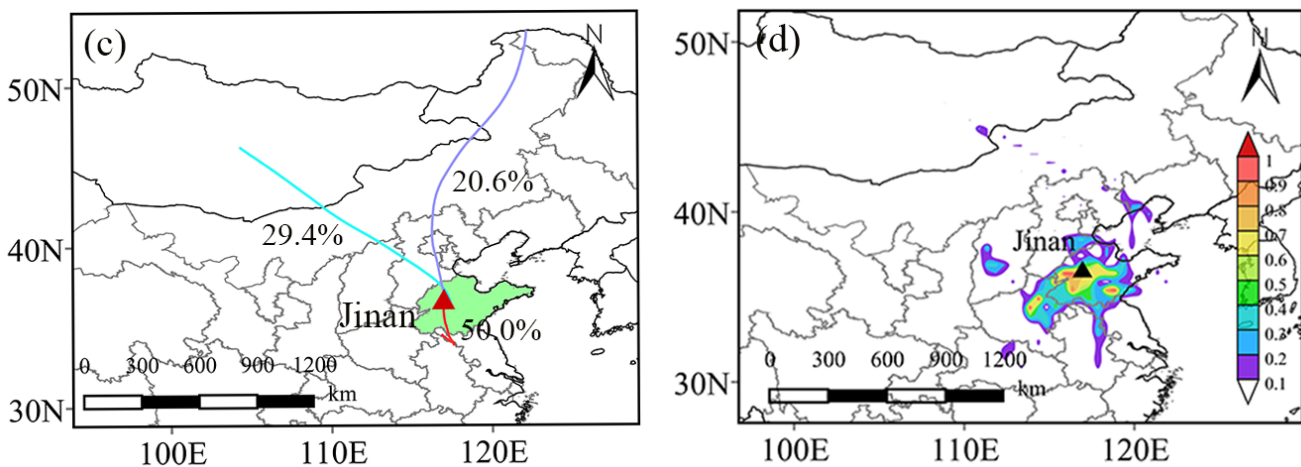

125 **Figure S1.** 48-h backward trajectories of air masses arriving at Jinan (a) before the LCD and (b) during the LCD. Potential source contribution function (PSCF) analysis of total detected organic compounds (TDOCs) in PM<sub>2.5</sub> (c) before the LCD and (d) during the LCD.

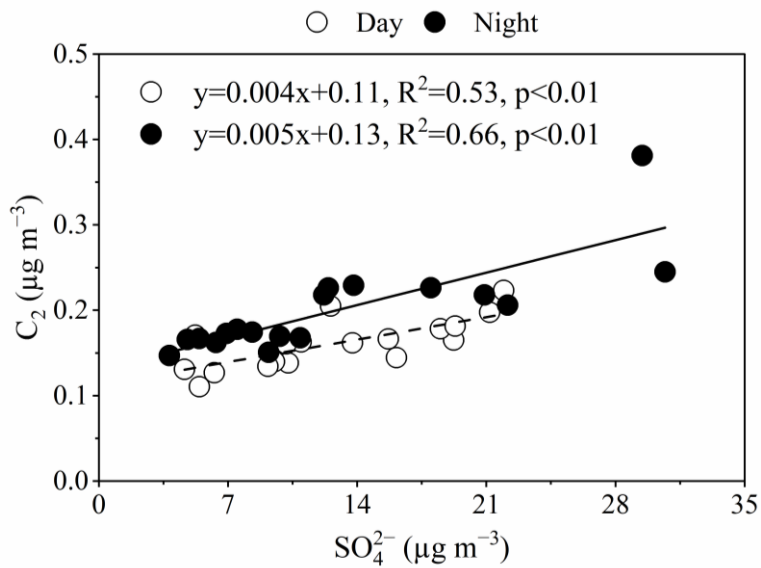

Figure S2. Correlation analysis for  $C_2$  and  $\text{SO}_4^{2-}$  during the daytime and nighttime before the LCD.

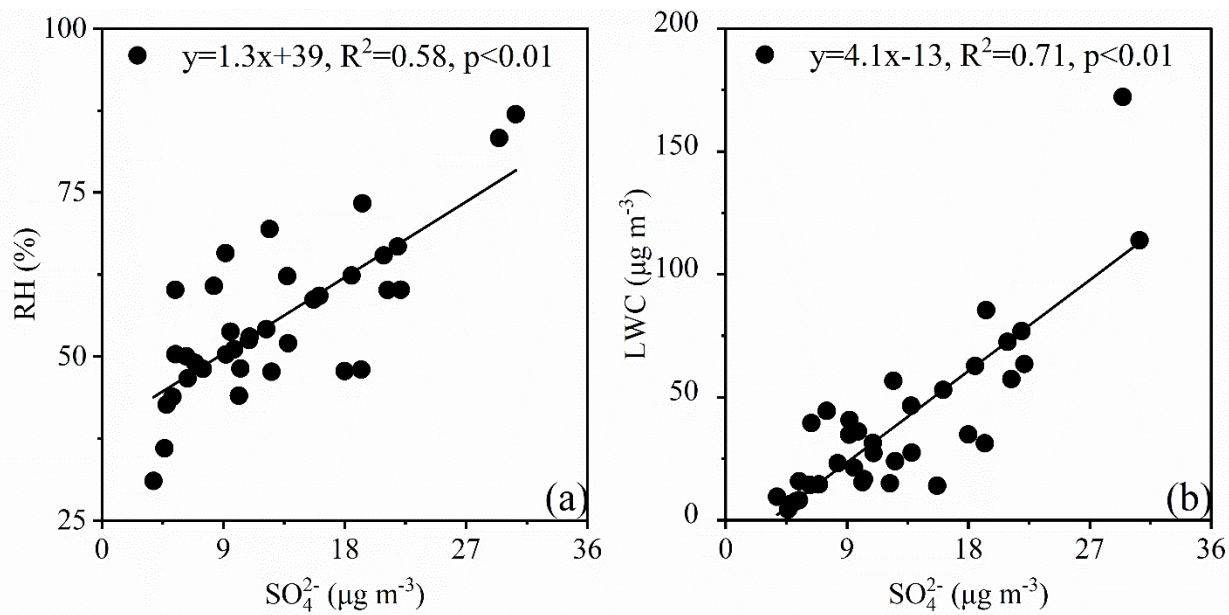

Figure S3. Relationships of  $\text{SO}_4^{2-}$  with (a) RH and (b) LWC before the LCD.



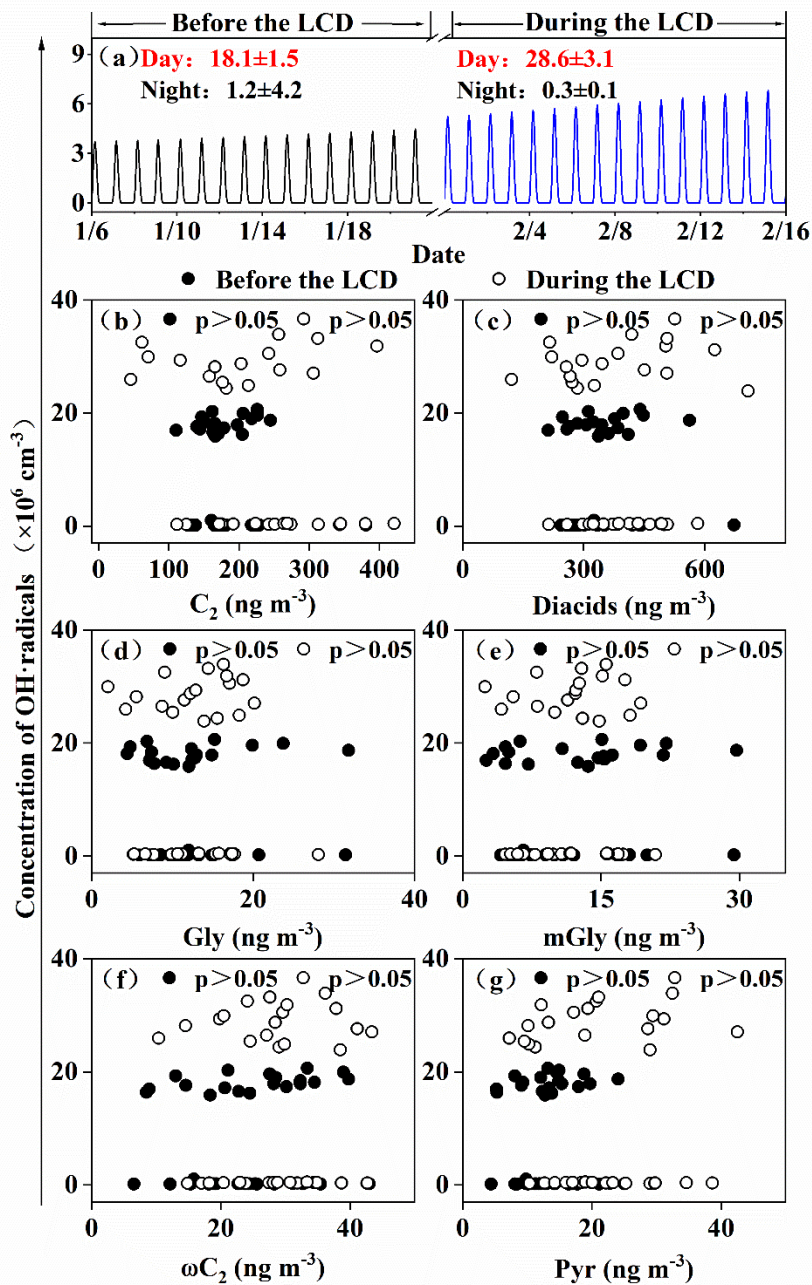

135 Figure S4. (a) Time series of OH· radical concentration per hour, and correlations of OH· radicals with (b) C<sub>2</sub>, (c) Diacids, (d) Gly, (e) mGly, (f) ωC<sub>2</sub>, and (g) Pyr before and during the LCD.

## References

- Aggarwal, S. G. and Kawamura, K.: Molecular distributions and stable carbon isotopic compositions of dicarboxylic acids and related compounds in aerosols from Sapporo, Japan: Implications for photochemical aging during long-range atmospheric transport, *Journal of Geophysical Research: Atmospheres*, 113, D14301, 10.1029/2007jd009365, 2008.
- 140 Bikkina, S., Kawamura, K., and Sarin, M.: Secondary Organic Aerosol Formation over Coastal Ocean: Inferences from Atmospheric Water-Soluble Low Molecular Weight Organic Compounds, *Environmental Science & Technology*, 51, 4347-4357, 10.1021/acs.est.6b05986, 2017.
- 145 Brown, S. G., Eberly, S., Paatero, P., and Norris, G. A.: Methods for estimating uncertainty in PMF solutions: Examples with ambient air and water quality data and guidance on reporting PMF results, *Science of The Total Environment*, 518-519, 626-635, <https://doi.org/10.1016/j.scitotenv.2015.01.022>, 2015.
- Cheng, C., Wang, G., Zhou, B., Meng, J., Li, J., Cao, J., and Xiao, S.: Comparison of dicarboxylic acids and related compounds in aerosol samples collected in Xi'an, China during haze and clean periods, *Atmospheric Environment*, 81, 443-449, <http://dx.doi.org/10.1016/j.atmosenv.2013.09.013>, 2013.
- 150 Cheng, Y., Zheng, G., Wei, C., Mu, Q., Zheng, B., Wang, Z., Gao, M., Zhang, Q., He, K., Carmichael, G., Pöschl, U., and Su, H.: Reactive nitrogen chemistry in aerosol water as a source of sulfate during haze events in China, *Science Advances*, 2, 2016.
- Devineni, S. R., Pavuluri, C. M., Wang, S., Ren, L., Xu, Z., Li, P., Fu, P., and Liu, C.-Q.: Size-Resolved Characteristics and Sources of Inorganic Ions, Carbonaceous Components and Dicarboxylic Acids, Benzoic Acid, Oxocarboxylic Acids and  $\alpha$ -Dicarbonyls in Wintertime Aerosols from Tianjin, North China, *Aerosol Science and Engineering*, 7, 1-22, 10.1007/s41810-022-00159-0, 2023.
- 155 Ho, K. F., Cao, J. J., Lee, S. C., Kawamura, K., Zhang, R. J., Chow, J. C., and Watson, J. G.: Dicarboxylic acids, ketocarboxylic acids, and dicarbonyls in the urban atmosphere of China, *Journal of Geophysical Research: Atmospheres*, 112, D22S27, 10.1029/2006jd008011, 2007.
- 160 Ho, K. F., Ho, S. S. H., Lee, S. C., Kawamura, K., Zou, S. C., Cao, J. J., and Xu, H. M.: Summer and winter variations of dicarboxylic acids, fatty acids and benzoic acid in PM<sub>2.5</sub> in Pearl Delta River Region, China, *Atmos. Chem. Phys.*, 11, 2197-2208, 10.5194/acp-11-2197-2011, 2011.
- Hovorka, J., Pokorná, P., Hopke, P. K., Křůmal, K., Mikuška, P., and Pišová, M.: Wood combustion, a dominant source of winter aerosol in residential district in proximity to a large automobile factory in Central Europe, *Atmospheric Environment*, 113, 98-107, <https://doi.org/10.1016/j.atmosenv.2015.04.068>, 2015.
- 165 Jung, J., Tsatsral, B., Kim, Y. J., and Kawamura, K.: Organic and inorganic aerosol compositions in Ulaanbaatar, Mongolia, during the cold winter of 2007 to 2008: Dicarboxylic acids, ketocarboxylic acids, and  $\alpha$ -dicarbonyls, *Journal of Geophysical Research: Atmospheres*, 115, D22203, 10.1029/2010jd014339, 2010.
- 170 Kawamura, K. and Watanabe, T.: Determination of Stable Carbon Isotopic Compositions of Low Molecular Weight

Dicarboxylic Acids and Ketocarboxylic Acids in Atmospheric Aerosol and Snow Samples, *Anal. Chem.*, 76, 5762-5768, 10.1021/ac049491m, 2004.

- 175 Kawamura, K. and Yasui, O.: Diurnal changes in the distribution of dicarboxylic acids, ketocarboxylic acids and dicarbonyls in the urban Tokyo atmosphere, *Atmospheric Environment*, 39, 1945-1960, <http://dx.doi.org/10.1016/j.atmosenv.2004.12.014>, 2005.
- Li, X., Yang, Z., Fu, P., Yu, J., Lang, Y., Liu, D., Ono, K., and Kawamura, K.: High abundances of dicarboxylic acids, oxocarboxylic acids, and  $\alpha$ -dicarbonyls in fine aerosols (PM<sub>2.5</sub>) in Chengdu, China during wintertime haze pollution, *Environmental Science and Pollution Research*, 22, 12902-12918, 10.1007/s11356-015-4548-x, 2015.
- 180 Li, Z., Zhou, R., Wang, Y., Wang, G., Chen, M., Li, Y., Wang, Y., Yi, Y., Hou, Z., Guo, Q., and Meng, J.: Characteristics and sources of amine-containing particles in the urban atmosphere of Liaocheng, a seriously polluted city in North China during the COVID-19 outbreak, *Environmental Pollution*, 289, 117887, <https://doi.org/10.1016/j.envpol.2021.117887>, 2021.
- Meng, J., Liu, X., Hou, Z., Yi, Y., Yan, L., Li, Z., Cao, J., Li, J., and Wang, G.: Molecular characteristics and stable carbon isotope compositions of dicarboxylic acids and related compounds in the urban atmosphere of the North China Plain: Implications for aqueous phase formation of SOA during the haze periods, *Science of The Total Environment*, 705, 135256, <https://doi.org/10.1016/j.scitotenv.2019.135256>, 2020.
- 185 Mkoma, S. L., Kawamura, K., and Tachibana, E.: Stable carbon isotopic compositions of low-molecular-weight dicarboxylic acids, glyoxylic acid and glyoxal in tropical aerosols: implications for photochemical processes of organic aerosols, *Tellus B: Chemical and Physical Meteorology*, 66, 23702, 10.3402/tellusb.v66.23702, 2014.
- 190 Nayebare, S. R., Aburizaiza, O. S., Siddique, A., Carpenter, D. O., Hussain, M. M., Zeb, J., Aburiziza, A. J., and Khwaja, H. A.: Ambient air quality in the holy city of Makkah: A source apportionment with elemental enrichment factors (EFs) and factor analysis (PMF), *Environmental Pollution*, 243, 1791-1801, <https://doi.org/10.1016/j.envpol.2018.09.086>, 2018.
- Norris, G., Duvall, R., Brown, S., & Bai, S. EPA positive matrix factorization (PMF) 5.0 fundamentals and user guide prepared for the US Environmental Protection Agency Office of Research and Development, Washington, DC, 2004.
- 195
- Pavuluri, C. M., Kawamura, K., Swaminathan, T., and Tachibana, E.: Stable carbon isotopic compositions of total carbon, dicarboxylic acids and glyoxylic acid in the tropical Indian aerosols: Implications for sources and photochemical processing of organic aerosols, *Journal of Geophysical Research: Atmospheres*, 116, <https://doi.org/10.1029/2011JD015617>, 2011.
- 200
- Pavuluri, C. M., Kawamura, K., Tachibana, E., and Swaminathan, T.: Elevated nitrogen isotope ratios of tropical Indian aerosols from Chennai: Implication for the origins of aerosol nitrogen in South and Southeast Asia, *Atmospheric Environment*, 44, 3597-3604, <https://doi.org/10.1016/j.atmosenv.2010.05.039>, 2010.
- Qi, W., Wang, G., Dai, W., Liu, S., Zhang, T., Wu, C., Li, J., Shen, M., Guo, X., Meng, J., and Li, J.: Molecular characteristics

- 205 and stable carbon isotope compositions of dicarboxylic acids and related compounds in wintertime aerosols of Northwest China, *Scientific Reports*, 12, 11266, 10.1038/s41598-022-15222-6, 2022.
- Shen, M., Ho, K. F., Dai, W., Liu, S., Zhang, T., Wang, Q., Meng, J., Chow, J. C., Watson, J. G., Cao, J., and Li, J.: Distribution and stable carbon isotopic composition of dicarboxylic acids, ketocarboxylic acids and  $\alpha$ -dicarbonyls in fresh and aged biomass burning aerosols, *Atmos. Chem. Phys.*, 22, 7489-7504, 10.5194/acp-22-7489-2022, 2022.
- 210 Shen, M., Qi, W., Guo, X., Dai, W., Wang, Q., Liu, Y., Zhang, Y., Cao, Y., Chen, Y., Li, L., Liu, H., Cao, J., and Li, J.: Influence of vertical transport on chemical evolution of dicarboxylic acids and related secondary organic aerosol from surface emission to the top of Mount Hua, Northwest China, *Science of The Total Environment*, 858, 159892, <https://doi.org/10.1016/j.scitotenv.2022.159892>, 2023.
- Shrivastava, M. K., Subramanian, R., Rogge, W. F., and Robinson, A. L.: Sources of organic aerosol: Positive matrix factorization of molecular marker data and comparison of results from different source apportionment models, *Atmospheric Environment*, 41, 9353-9369, <https://doi.org/10.1016/j.atmosenv.2007.09.016>, 2007.
- 215 Vossler, T., Černíkovský, L., Novák, J., and Williams, R.: Source apportionment with uncertainty estimates of fine particulate matter in Ostrava, Czech Republic using Positive Matrix Factorization, *Atmospheric Pollution Research*, 7, 503-512, <https://doi.org/10.1016/j.apr.2015.12.004>, 2016.
- Bikkina, S., Kawamura, K., and Sarin, M.: Secondary Organic Aerosol Formation over Coastal Ocean: Inferences from Atmospheric Water-Soluble Low Molecular Weight Organic Compounds, *Environmental Science & Technology*, 51, 4347-4357, 10.1021/acs.est.6b05986, 2017.
- 220 Sun, Y. L., Wang, Z. F., Fu, P. Q., Yang, T., Jiang, Q., Dong, H. B., Li, J., and Jia, J. J.: Aerosol composition, sources and processes during wintertime in Beijing, China, *Atmos. Chem. Phys.*, 13, 4577-4592, 10.5194/acp-13-4577-2013, 2013.
- 225 Wang, G., Kawamura, K., Cheng, C., Li, J., Cao, J., Zhang, R., Zhang, T., Liu, S., and Zhao, Z.: Molecular Distribution and Stable Carbon Isotopic Composition of Dicarboxylic Acids, Ketocarboxylic Acids, and  $\alpha$ -Dicarbonyls in Size-Resolved Atmospheric Particles From Xi'an City, China, *Environmental Science & Technology*, 46, 4783-4791, 10.1021/es204322c, 2012.
- Wang, H. and Kawamura, K.: Stable carbon isotopic composition of low-molecular-weight dicarboxylic acids and ketoacids in remote marine aerosols, *Journal of Geophysical Research: Atmospheres*, 111, <https://doi.org/10.1029/2005JD006466>, 2006.
- 230 Wang, Y., Zhang, Q., Jiang, J., Zhou, W., Wang, B., He, K., Duan, F., Zhang, Q., Philip, S., and Xie, Y.: Enhanced sulfate formation during China's severe winter haze episode in January 2013 missing from current models, *Journal of Geophysical Research: Atmospheres*, 119, 4104-4114, <https://doi.org/10.1002/2013JD021426>, 2014.
- 235 Wu, X., Cao, F., Haque, M., Fan, M.-Y., Zhang, S.-C., and Zhang, Y.-L.: Molecular composition and source apportionment of fine organic aerosols in Northeast China, *Atmospheric Environment*, 239, 117722, <https://doi.org/10.1016/j.atmosenv.2020.117722>, 2020.
- Xu, B., Tang, J., Tang, T., Zhao, S., Zhong, G., Zhu, S., Li, J., and Zhang, G.: Fates of secondary organic aerosols in the

atmosphere identified from compound-specific dual-carbon isotope analysis of oxalic acid, *Atmos. Chem. Phys. Discuss.*, 2022, 1-32, 10.5194/acp-2022-707, 2022a.

240

Xu, B., Zhang, G., Gustafsson, Ö., Kawamura, K., Li, J., Andersson, A., Bikkina, S., Kunwar, B., Pokhrel, A., Zhong, G., Zhao, S., Li, J., Huang, C., Cheng, Z., Zhu, S., Peng, P., and Sheng, G.: Large contribution of fossil-derived components to aqueous secondary organic aerosols in China, *Nature Communications*, 13, 5115, 10.1038/s41467-022-32863-3, 2022b.

245

Zhang, R., Wang, G., Guo, S., Zamora, M. L., Ying, Q., Lin, Y., Wang, W., Hu, M., and Wang, Y.: Formation of Urban Fine Particulate Matter, *Chemical Reviews*, 115, 3803-3855, 10.1021/acs.chemrev.5b00067, 2015.

Zhang, Y.-L., Kawamura, K., Cao, F., and Lee, M.: Stable carbon isotopic compositions of low-molecular-weight dicarboxylic acids, oxocarboxylic acids,  $\alpha$ -dicarbonyls, and fatty acids: Implications for atmospheric processing of organic aerosols, *Journal of Geophysical Research: Atmospheres*, 121, 3707-3717, 10.1002/2015jd024081, 2016.

250

Zhao, W., Kawamura, K., Yue, S., Wei, L., Ren, H., Yan, Y., Kang, M., Li, L., Ren, L., Lai, S., Li, J., Sun, Y., Wang, Z., and Fu, P.: Molecular distribution and compound-specific stable carbon isotopic composition of dicarboxylic acids, oxocarboxylic acids and  $\alpha$ -dicarbonyls in PM<sub>2.5</sub> from Beijing, China, *Atmos. Chem. Phys.*, 18, 2749-2767, 10.5194/acp-18-2749-2018, 2018.

255

Zhao, X., Pavuluri, C. M., Dong, Z., Xu, Z., Nirmalkar, J., Jung, J., Fu, P., and Liu, C.-Q.: Molecular Distributions and <sup>13</sup>C Isotopic Composition of Dicarboxylic Acids, Oxocarboxylic Acids, and  $\alpha$ -dicarbonyls in Wintertime PM<sub>2.5</sub> at Three Sites Over Northeast Asia: Implications for Origins and Long-Range Atmospheric Transport, *Journal of Geophysical Research: Atmospheres*, 128, e2023JD038864, <https://doi.org/10.1029/2023JD038864>, 2023.
